# Supplementary material for: Stemness and chemotherapeutic drug resistance induced by EIF5A2 overexpression in esophageal squamous cell carcinoma
Source: PubMed Central journal article supplement (PMC4694887; doi:10.18632/oncotarget.4581), 2015-07-20
Supplement: oncotarget-06-26079-s001.pdf [file oncotarget-06-26079-s001.pdf]

## SUPPLEMENTARY TABLE

Supplementary Table S1: Primer sequences

|           |                               |
|-----------|-------------------------------|
| OCT4-F1   | 5' CTTGAATCCCGAATGGAAAGGG 3'  |
| OCT4-R1   | 5' GTGTATATCCCAGGGTGATCCTC 3' |
| CD24-F1   | 5' CTCCTACCCACGCAGATTTATTC 3' |
| CD24-R1   | 5' AGAGTGAGACCACGAAGAGAC 3'   |
| Nanog-F1  | 5' TTTGTGGGCCTGAAGAAAAC 3'    |
| Nanog-R1  | 5' AGGGCTGTCCTGAATAAGCAG 3'   |
| p75NTR-F1 | 5' CCTACGGCTACTACCAGGATG 3'   |
| p75NTR-R1 | 5' CACACGGTGTTCTGCTTGT 3'     |
| CD44-F1   | 5' CTGCCGCTTTCAGGTGTA 3'      |
| CD44-R1   | 5' CATTGTGGGCAAGGTGCTATT 3'   |
| ABCG2-F1  | 5' ACGAACGGATTAACAGGGTCA 3'   |
| ABCG2-R1  | 5' CTCCAGACACACCACGGAT 3'     |
| 18S-F1    | 5' CTCTTAGCTGAGTGTCCCGC 3'    |
| 18S-R1    | 5' CTGATCGTCTTCGAACCTCC 3'    |
